# Supplementary material
Source: HighWire-hosted journal article supplement (https://bmjopensem.bmj.com/content/4/1/e000341)
Supplement: inline-supplementary-material-1 [file inline-supplementary-material-1.docx]

**(Children OR Pupils OR Youth OR Adolescence OR Adolescent*) AND (School* OR Classroom* OR Classroom-based OR Class-based) AND (movement break* OR exercise Break* OR active learning OR active lesson* OR education outside of the classroom OR Acute exercise OR Acute Physical activity OR High-intensity interval activity OR High-intensity interval training OR High Intensity Interval Exercise OR exercising OR (Moving and academic learning)) AND (Physical activity OR Exercise OR MVPA OR Moderate-to-vigorous physical activity OR Sedentary time OR Sedentary behaviour OR sedentariness) AND (Cognitive function* OR Cognitive functioning OR Cognitive performance OR Cognition OR Memory OR Short-term memory OR long-term memory OR declarative memory OR semantic memory OR episodic memory OR procedural memory OR Learn OR Learning OR Explicit learning OR implicit Learning OR Information retrieval OR Information processing OR Perceptual skills OR Executive function* OR Problem Solving OR Attention OR Inhibition OR Working memory OR Cognitive flexibility OR Shifting OR Updating OR Planning OR Academic achievement OR Intelligence quotient OR State and assessment OR Educational measurement OR Educational outcome OR Educational measurement OR educational outcome OR academic performance OR academic attainment OR Academic achievement gap OR achievement gaps OR student performance OR time on task OR standardized test OR standardized tests OR standardized testing OR reading achievement OR reading performance OR reading assessment* OR math achievement OR math performance OR math assessment* OR mathematics achievement OR mathematics performance OR mathematics assessment* OR spelling OR science performance OR science achievement OR science assessment OR science assessments OR writing performance OR writing achievement OR writing assessment OR test score* OR testing score* OR Exam* OR Examination* OR exam score* OR classroom learning OR Classroom behaviour OR classroom performance OR Time on task OR Concentration OR Concentrate) NOT (Arthritis OR Allergy OR Cystic fibrosis OR multiple sclerosis OR Cardiovascular disease OR Coronary heart disease OR Oxidative function OR cerebral palsy OR Haemophilia OR Concussion* OR Incontinence OR concussive OR depression OR Cancer OR Dementia OR Alzheimer’s OR Parkinson’s OR ADHD OR Attention deficit disorder OR Syndrome OR Autism OR Autistic OR Intellectual disability OR epilepsy OR Preterm OR Older adult* OR Adult* OR Midlife OR Maternal OR Paternal OR Father* OR Mother* OR Parenting OR Older people OR Pregnancy OR Pregnant OR Mice OR Rat OR Rats OR Athlete* OR Sportsmen OR sportswomen OR Swim* OR Appetite OR Diet* Or Eating OR Food intake OR Nutrition OR Meal OR Anorexia OR Creatine OR Hormonal OR Breastfeeding OR Social media OR Pulmonary OR Parent OR Vegetable OR Cross-sectional OR longitudinal OR altitude OR Sleep Or Injury Or Crime or Military OR Transport*)**

**SCOPUS**

**TITLE-ABS-KEY((((children OR pupils OR youth OR adolescence OR adolescent*) AND (school* OR Classroom* OR Classroom-based OR Class-based) AND ((movement break*) OR (exercise Break*) OR (active learning) OR (active lesson*) OR (education outside of the classroom) OR (Acute exercise) OR (Acute physical activity) OR (High-intensity interval activity) OR (High-intensity interval training) OR (High Intensity Interval Exercise ) OR Exercising OR (Moving and academic learning))) AND ((Cognitive function*) OR (Cognitive functioning) OR (Cognitive performance) OR Cognition OR Memory OR (Short-term memory) OR (long-term memory) OR (declarative memory) OR (Semantic memory) OR (episodic memory) OR (procedural memory) OR Learn OR Learning OR (Explicit learning) OR (Implicit Learning) OR (Information retrieval) OR (Information processing) OR (Perceptual skills) OR (Executive function*) OR (Problem Solving) OR Attention OR Inhibition OR (Working memory) OR (Cognitive flexibility) OR Shifting OR Updating OR Planning OR (Academic achievement) OR (Intelligence quotient) OR (State and assessment) OR (Educational measurement) OR (Educational outcome) OR (Educational measurement) OR (Educational outcome) OR (Academic performance) OR (Academic attainment) OR (Academic achievement gap) OR (Achievement gaps) OR (Student performance) OR (Time on task) OR (Standardized test) OR (Standardized tests) OR (Standardized testing) OR (Reading achievement) OR (Reading performance) OR (Reading assessment*) OR (Math achievement) OR (Math performance) OR (Math assessment*) OR (Mathematics achievement) OR (Mathematics performance) OR (Mathematics assessment*) OR Spelling OR (Science performance) OR (Science achievement) OR (Science assessment) OR (Science assessments) OR (Writing performance) OR (Writing achievement) OR (Writing assessment) OR (Test score*) OR (Testing score*) OR Exam* OR Examination* OR (Exam score*) OR (Classroom learning) OR (Classroom behaviour) OR (Classroom performance) OR (Time on task) OR Concentration OR Concentrate)) AND ((Physical activity) OR Exercise OR MVPA OR (Moderate-to-vigorous physical activity) OR (Moderate to vigorous physical activity) OR (Sedentary time) OR sedentariness OR (Sedentary behaviour))) AND NOT ((Arthritis OR Allergy OR (Cystic fibrosis) OR (multiple sclerosis) OR (Cardiovascular disease) OR (Coronary heart disease) OR (Oxidative function) OR (cerebral palsy) OR Haemophilia OR Concussion* OR Incontinence OR concussive OR depression OR Cancer OR Dementia OR Alzheimer's OR Parkinson's OR ADHD OR (Attention deficit disorder) OR Syndrome OR Autism OR Autistic OR (Intellectual disability) OR epilepsy OR Preterm OR Older adult* OR Adult* OR Midlife OR Maternal OR Paternal OR Father* OR Mother* OR Parenting OR Older people OR Pregnancy OR Pregnant OR Mice OR Rat OR Rats OR Athlete* OR Sportsmen OR sportswomen OR Swim* OR Appetite OR Diet* Or Eating OR Food intake OR Nutrition OR Meal OR Anorexia OR Creatine OR Hormonal OR Breastfeeding OR (Social media) OR Pulmonary OR Parent OR Vegetable OR Cross-sectional OR longitudinal OR altitude OR Sleep Or Injury Or Crime or Military Or Transport)) AND ( LIMIT-TO ( LANGUAGE,"English" ) )**
